# Supplementary material for: Carboxymethyl cellulose–poly-m-phenylenediamine composite membrane for gold recovery from e-waste
Source: Royal Society of Chemistry journal article supplement (doi:10.1039/d4re00395k), 2024-11-21
Supplement: d4re00395k1.pdf [file d4re00395k1.pdf]

## Supplementary Information

### **Carboxymethyl cellulose-Poly-m-phenylenediamine composite membrane for gold recovery from e-waste**

Zhiwei Huang, Yaxin Yuan, Xinyi Li, Yiyang Li, Min Wang\* and Zhuqing Wang\*

Ultra-high Molecular Weight Polyethylene Fiber Engineering Research Center of  
Anhui Province, Anqing Normal University, Anqing, 246133, China.

\*Corresponding authors: Min Wang (wangmin08@aqnu.edu.cn)

Zhuqing Wang (wangzhuqing@vip.163.com)

**Table S1.** Cost of preparing one kilogram CMC-PmPD composite membrane.

| Raw Materials          | Usage    | Unit Price (\$) | Cost (\$) |
|------------------------|----------|-----------------|-----------|
| glycerol               | 0.385 L  | 8.78            | 3.38      |
| CMC-Na                 | 0.19 Kg  | 18.2            | 3.46      |
| deionized water        | 57.5 Kg  | 0.28            | 16.1      |
| Poly-aluminum chloride | 5.08 Kg  | 14.38           | 73.05     |
| PmPD                   | 0.385 Kg | 166.51          | 64        |
| power                  | 4.02 kWh | 0.083           | 0.33      |
| total                  |          |                 | 160.32    |

**Table S2.** Comparison of experimental and diffraction data from the ICDD database for Au(III) containing.

| No. of<br>Diffraction<br>Line | 2 $\theta$ (°)<br>Exp. | 2 $\theta$ (°)<br>ICDD | $ \Delta 2\theta $ | d <sub>hkl</sub> (Å)<br>Exp. | d <sub>hkl</sub> (Å)<br>ICDD | (hkl) |
|-------------------------------|------------------------|------------------------|--------------------|------------------------------|------------------------------|-------|
| 1                             | 38.3                   | 38.184                 | 0.116              | 2.349                        | 2.355                        | (111) |
| 2                             | 44.46                  | 44.392                 | 0.068              | 2.037                        | 2.039                        | (200) |
| 3                             | 64.68                  | 64.576                 | 0.104              | 1.441                        | 1.442                        | (220) |
| 4                             | 77.72                  | 77.517                 | 0.073              | 1.229                        | 1.230                        | (311) |
